# Supplementary material for: Neutralising antibodies predict protection from severe COVID-19
Source: bioRxiv or medRxiv preprint supplement (doi:10.1101/2022.06.09.22275942), 2022-06-14
Supplement: Supplementary file [file media-1.pdf]

| Study                             | Vaccine                                  | Timeframe postvaccination | Measure/s of effectiveness                                                         | Age groups included            | Variants analysed                   | Study Type                  | Country | Data derived from                                         |
|-----------------------------------|------------------------------------------|---------------------------|------------------------------------------------------------------------------------|--------------------------------|-------------------------------------|-----------------------------|---------|-----------------------------------------------------------|
| Tartof et. al. <sup>+1</sup>      | BNT162b2 <sup>A</sup>                    | 0.5 – 7.25                | i) PCR positive<br>ii) Hospitalisation <sup>B</sup>                                | 12-15<br>16-44<br>45-64<br>≥65 | pre-Delta<br>Delta                  | Retrospective cohort study  | USA     | Appendix tables 6-8                                       |
| Goldberg et. al. <sup>+2</sup>    | BNT162b2 <sup>A</sup>                    | 1.5-6.5 months            | i) PCR positive <sup>C</sup><br>ii) Severe disease <sup>D</sup>                    | 16-39<br>40-59<br>≥60          | Delta                               | Retrospective cohort study  | Israel  | Table S7                                                  |
| Chemaitelly et. al. <sup>+3</sup> | BNT162b2                                 | 0.5-≥7 months             | i) PCR positive<br>ii) Hospitalisation (Severe disease Critical Disease And Fatal) | any                            | Alpha, Beta <sup>E</sup> ,<br>Delta | Test negative case control  | Qatar   | Table 2                                                   |
| Keehner et. al. <sup>4</sup>      | BNT162b2 or mRNA-1273                    | 1-7 months                | PCR positive and > 1 symptom                                                       | ≥18                            | Delta <sup>F</sup>                  | Retrospective cohort study  | USA     | Calculated based on attack rates for July given in text   |
| Andrews et. al. <sup>5</sup>      | BNT162b2<br>ChAdOx1 nCoV-19<br>mRNA-1273 | 0.5-≥9 months             | i) PCR confirmed symptomatic disease<br>ii) Hospitalisation<br>iii) Death          | ≥16<br>≥65<br>40-64<br>16-39   | Alpha<br>Delta                      | Test negative case control  | England | Table 1<br>Table 2<br>Table S10<br>Table S11<br>Table S12 |
| El Sahly et. al. <sup>6</sup>     | mRNA-1273                                | 0.5-≥8 months             | i) Prevention of illness<br>ii) Prevention of severe disease                       | ≥18-<65<br>≥65                 | Ancestral                           | Randomised controlled trial | USA     | Supplementary Table S30                                   |

|                                   |                                          |                 |                                                                                |                       |                    |                             |                                                                 |                               |
|-----------------------------------|------------------------------------------|-----------------|--------------------------------------------------------------------------------|-----------------------|--------------------|-----------------------------|-----------------------------------------------------------------|-------------------------------|
| Thomas et. al. <sup>7</sup>       | BNT162b2                                 | 0.25-≥4 months  | i) Laboratory confirmed disease (≥ 1 symptom)                                  | 12-15<br>≥16          | pre-Delta          | Randomised controlled trial | USA<br>Argentina<br>Brazil<br>South Africa<br>Germany<br>Turkey | Figure 2                      |
| Rosenberg et. al. <sup>8</sup>    | BNT162b2 mRNA-1273                       | 0-8 months      | i) Laboratory confirmed disease<br>ii) Hospitalisation                         | 18-49<br>50-64<br>≥65 | pre-Delta<br>Delta | Retrospective cohort study  | USA                                                             | Tables 2 and 3                |
| Andrews et. al. <sup>9,10</sup>   | BNT162b2<br>ChAdOx1 nCoV-19<br>mRNA-1273 | 0.5-~25 months  | i) PCR confirmed symptomatic disease<br>ii) Hospitalisation                    | ≥18                   | Delta<br>Omicron   | Test negative case control  | England                                                         | Table 3                       |
| Ferdinands et. al. <sup>11</sup>  | mRNA vaccines                            | 0.5-25 months   | i) PCR confirmed hospital presentation<br>ii) PCR confirmed hospital admission | ≥18                   | Delta<br>Omicron   | Test negative case control  | USA                                                             | Table 2                       |
| Bruxvoort et. al. <sup>†12</sup>  | mRNA-1273                                | 0.5-6 months    | PCR confirmed infection                                                        | ≥18                   | Delta              | Test negative case control  | USA                                                             | Extracted from Figure 2       |
| Poukka et. al. <sup>†13</sup>     | mRNA vaccines<br>ChAdOx1 nCoV-19         | 0-8 months      | i) Laboratory confirmed infection<br>ii) Hospitalisation                       | 16-69                 | pre-Delta<br>Delta | Retrospective cohort study  | Finland                                                         | Supplementary table 2 and 3   |
| Tseng et. al. <sup>14</sup>       | mRNA-1273                                | 0.5-25 months   | i) Infection ii) Hospitalisation                                               | ≥18                   | Delta<br>Omicron   | Test negative case control  | USA                                                             | Table 2                       |
| Skowronski et. al. <sup>†15</sup> | BNT162b2                                 | 0.5-11.5 months | i) PCR positive infection                                                      | ≥18                   | Delta              | Test negative case control  | Canada                                                          | Supplementary table 14 and 15 |

|                                   |                                  |               |                     |     |                  |                               |     |         |
|-----------------------------------|----------------------------------|---------------|---------------------|-----|------------------|-------------------------------|-----|---------|
|                                   | ChAdOx1-<br>nCoV-19<br>mRNA-1273 |               | ii) hospitalisation |     |                  |                               |     |         |
| Thompson<br>et. al. <sup>16</sup> | mRNA vaccines                    | 0.5-25 months | Hospitalisation     | ≥18 | Delta<br>Omicron | Test negative<br>case control | USA | Table 2 |

*Supplementary Table 1 Data sources for Efficacy Data*

<sup>A</sup> Fully vaccinated = 7 days + post second dose

<sup>B</sup> Hospitalisation data was not split by variant

<sup>C</sup> PCR positive efficacy included for ages >16 years

<sup>D</sup> Severe disease efficacy included for ages >40 years

<sup>E</sup> Effectiveness against Beta infections were not included in this analysis

<sup>F</sup> Infections were >95% Delta in timeframe analysed

<sup>†</sup> Denotes studies that included efficacy against confirmed infection without reporting on symptoms. These data were not included in the final analysis.

## References:

1. Tartof SY, Slezak JM, Fischer H, et al. Effectiveness of mRNA BNT162b2 COVID-19 vaccine up to 6 months in a large integrated health system in the USA: a retrospective cohort study. *Lancet* 2021; **398**(10309): 1407-16.
2. Goldberg Y, Mandel M, Bar-On YM, et al. Waning Immunity after the BNT162b2 Vaccine in Israel. *N Engl J Med* 2021; **385**(24): e85.
3. Chemaitelly H, Tang P, Hasan MR, et al. Waning of BNT162b2 Vaccine Protection against SARS-CoV-2 Infection in Qatar. *N Engl J Med* 2021; **385**(24): e83.
4. Keehner J, Horton LE, Binkin NJ, et al. Resurgence of SARS-CoV-2 Infection in a Highly Vaccinated Health System Workforce. *N Engl J Med* 2021; **385**(14): 1330-2.
5. Andrews N, Tessier E, Stowe J, et al. Duration of Protection against Mild and Severe Disease by Covid-19 Vaccines. *N Engl J Med* 2022; **386**(4): 340-50.
6. El Sahly HM, Baden LR, Essink B, et al. Efficacy of the mRNA-1273 SARS-CoV-2 Vaccine at Completion of Blinded Phase. *N Engl J Med* 2021; **385**(19): 1774-85.
7. Thomas SJ, Moreira ED, Jr., Kitchin N, et al. Safety and Efficacy of the BNT162b2 mRNA Covid-19 Vaccine through 6 Months. *N Engl J Med* 2021; **385**(19): 1761-73.
8. Rosenberg ES, Dorabawila V, Easton D, et al. Covid-19 Vaccine Effectiveness in New York State. *N Engl J Med* 2022; **386**(2): 116-27.
9. Andrews N, Stowe J, Kirsebom F, et al. Covid-19 Vaccine Effectiveness against the Omicron (B.1.1.529) Variant. *N Engl J Med* 2022; **386**(16): 1532-46.
10. Andrews N, Stowe J, Kirsebom F, et al. Effectiveness of COVID-19 vaccines against the Omicron (B.1.1.529) variant of concern. *medrxiv* 2021: doi:10.1101/2021.12.14.21267615.
11. Ferdinands JM, Rao S, Dixon BE, et al. Waning 2-Dose and 3-Dose Effectiveness of mRNA Vaccines Against COVID-19-Associated Emergency Department and Urgent Care Encounters and Hospitalizations Among Adults During Periods of Delta and Omicron Variant Predominance - VISION Network, 10 States, August 2021-January 2022. *MMWR Morb Mortal Wkly Rep* 2022; **71**(7): 255-63.
12. Bruxvoort KJ, Sy LS, Qian L, et al. Effectiveness of mRNA-1273 against delta, mu, and other emerging variants of SARS-CoV-2: test negative case-control study. *BMJ* 2021; **375**: e068848.
13. Poukka E, Baum U, Palmu AA, et al. Cohort study of Covid-19 vaccine effectiveness among healthcare workers in Finland, December 2020 - October 2021. *Vaccine* 2022; **40**(5): 701-5.
14. Tseng HF, Ackerson BK, Luo Y, et al. Effectiveness of mRNA-1273 against SARS-CoV-2 Omicron and Delta variants. *Nat Med* 2022; **28**(5): 1063-71.
15. Skowronski DM, Febriani Y, Ouakki M, et al. Two-dose SARS-CoV-2 vaccine effectiveness with mixed schedules and extended dosing intervals: test-negative design studies from British Columbia and Quebec, Canada. *medrxiv* 2021.
16. Thompson MG, Natarajan K, Irving SA, et al. Effectiveness of a Third Dose of mRNA Vaccines Against COVID-19-Associated Emergency Department and Urgent Care Encounters and Hospitalizations Among Adults During Periods of Delta and Omicron Variant Predominance - VISION Network, 10 States, August 2021-January 2022. *MMWR Morb Mortal Wkly Rep* 2022; **71**(4): 139-45.
